# Supplementary material
Source: Springer Nature journal article supplement (https://www.springermedizin.de/resource/supplementary/12888_2011_864_MOESM1_ESM.pdf/9478396)
Supplement: MOESM1 [file 9478396]

**Figure 1**

**Completely standardized factor loading from the confirmatory factor analysis**

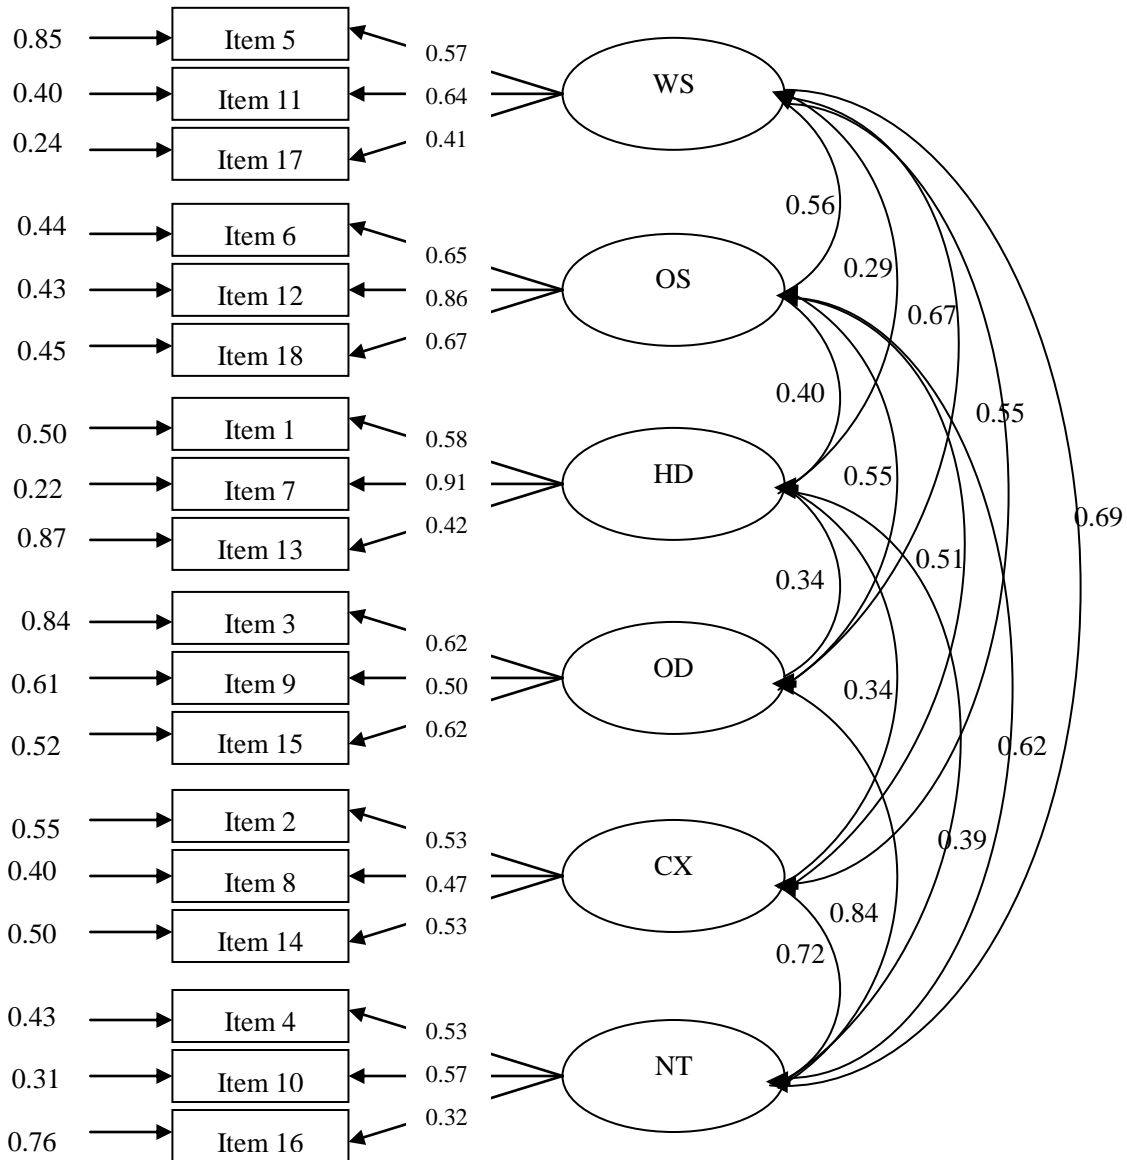

Note: WS:Washing; OS:Obsessing; HD:Hoarding; OR:Odering; CK:Checking; NT:Neutralizing
